# Supplementary material for: Efficient generation of mouse ESCs-like pig induced pluripotent stem cells
Source: PubMed Central journal article supplement (PMC3996154; doi:10.1007/s13238-014-0043-2), 2014-03-27
Supplement: 13238_2014_43_MOESM1_ESM.pdf [file 13238_2014_43_MOESM1_ESM.pdf]

## **Supplementary Materials**

### **Materials and methods**

#### **Reagents and media**

The reagents and basic media used in this study were purchased from Life Technologies. All small molecular compounds were purchased from Stemgent, Inc unless otherwise stated. The porcine embryonic fibroblast (PEF) of Duroc and Landrace pig were provided by Beijing Farm Animal Research Center. The recipient pigs for embryo transfer and the ICR mice for isolation of mouse embryonic fibroblast (MEF) were purchased from Beijing Vital River Company. All animals used in this study were handled according to the Guidelines of the Care and Use of Laboratory Animals established by Beijing Association for Laboratory Animal Science.

#### **Cell culture**

The KOSR medium consist of 76% Knockout Dulbecco's Modified Eagle's Medium (KO-DMEM, Invitrogen), 20% knockout serum replacement (Knockout SR, Invitrogen), 8 ng/ml bFGF (R&D), 2 mM L-glutamine (Invitrogen), 0.1 mM  $\beta$ -mercaptoethanol (Sigma), 1% MEM nonessential amino acids (NEAA, Invitrogen), and 1% penicillin-streptomycin (SP, Invitrogen). LBX medium contains small molecular compounds including Erk inhibitor PD0325901 (PD, 1  $\mu$ M), Gsk3 inhibitor CHIR99021 (CH, 3  $\mu$ M), activin receptor inhibitor SB431542 (SB, 2  $\mu$ M) and ascorbic acid (VC, 50 ng/ml) as described previously (Gu et al., 2012). DMEM medium consist of 88% high glucose DMEM, 10% fetal bovine serum (FBS, Invitrogen), 1% NEAA, 2 mM L-glutamine, and 1% SP.

PEFs was obtained from 33.5 dpc pig embryos, and enzymatically digested by collagenase IV. They were cultured in DMEM medium and passaged using 0.25% Trypsin-EDTA (Invitrogen). The culture system of pips\_h cells was similar to that of human ESCs (Hao et al., 2009). Pips\_m cells were cultured in LBX medium and digested with TrypLE™ (Invitrogen). Both the porcine and mouse cells were cultured in a humid incubator at 37°C and 5% CO<sub>2</sub> (Thermo).

#### **Retroviral transduction and infection**

Retroviral transduction and infection were performed according to previously published protocol (Aasen et al., 2008). In brief, four mouse retroviral vectors, pMXs-Oct4, Sox2, Klf4 and c-Myc, were purchased from Addgene. A 100-mm dish of 293T cells were transfected with 12  $\mu$ g retroviral vectors, 4  $\mu$ g VSV-G and 8  $\mu$ g Gag-Pol vector (with LTX reagents) according to the manufacturer's protocol (Invitrogen). 12 h later, the medium was replaced by

DMEM containing 1% FBS, 1%NEAA, 2 mM L-glutamine, and 1% SP. The supernatant was harvested after 36 h and 60 h, respectively. They were filtered through 0.45 µm cellulose acetate filter (Millipore), and concentrated by centrifugal filter at 4000 rpm for 30 min. Finally, 10<sup>4</sup> PEFs per well were infected with concentrated virus in a 24-well plate. When the PEFs reached 90% confluence, they were split into 12-well plates pre-seeded with feeders. On the second day, the media were replaced by KOSR or LBX.

### **Immunofluorescence analysis and alkaline phosphatase staining**

The piPSCs were fixed with 4% paraformaldehyde at room temperature for 10 minutes, permeabilized with 0.5% Triton X-100 at 37 °C for 10 minutes and blocked in 2% bovine serum albumin (BSA). The cells were incubated with the primary antibodies against OCT4 (Santa Cruz), NANOG (abnova), neuronal Class III β-Tubulin (Chemicon, Tuj1), H3K27 trimethyl (Millipore, H3K27 me3)(Shen et al., 2008), SSEA4 (Millipore), SSEA1 (Millipore) and TRA-1-60 (Millipore) at 4°C overnight. The second day, followed by rinsing with PBS three times, the cells were incubated with Alexa Fluor secondary antibody (Jackson) at 37 °C for 1 hour. Finally, DNA was stained with propidium iodide (10 µg/ml; Molecular Probes, OR) or Hoechst 33342 (10 µg/ml, Invitrogen). Alkaline phosphatase (AP) staining was performed with BCIP/NBT Alkaline Phosphatase Colour Development Kit (Beyotime) according to the manufacturer's instructions.

### **Transgenic manipulation of piPSCs**

When carrying out transgenic manipulation, the piPSCs were digested into single cells. 1×10<sup>6</sup> cells were electroporated with 6 µg plasmid carrying a PGK–neo<sup>r</sup> cassette and 2 µg plasmid carrying a transposase cassette by Neon Transfection System (Invitrogen) at 2400 V, 20 ms and two pulses according to the manufacturer's instructions. Then the cells were plated onto 60-mm dishes coated with G418-resistant feeders and filled with the culture medium containing 250 µg/ml G418 for selection of resistant cells. After 4-6 days, G418-resistant colonies were selected for sub-cell-line derivation.

### **Karyotype analysis**

Karyotype analysis was performed as previously described (Zhao et al., 2009).

### **Embryoid body formation**

PiPSCs were digested into single cells and transferred into gelatin-coated plates followed by incubating in DMEM medium for 10 min to discard the feeder cells. Then the suspensions were harvested and transferred to a dish containing KOSR medium lacking bFGF. The

medium was changed every other day and on day 6 the EBs were collected.

### **Teratoma formation and histological analysis**

After digesting, the piPSCs were transferred to gelatincoated plates to discard the feeder cells. Then, collect the cells for centrifuge. Next, suspend the cell pellets using PBS and 300  $\mu$ l suspension containing  $1 \times 10^7$  piPSCs were injected under the skin of non-obese diabetic/severe combined immune-deficient (NOD/SCID) mice. The teratomas could be harvested for histological analysis at 4 weeks. And then the tumors are fixed and sliced. Sections were stained with haematoxylin and eosin.

### **RT-PCR and quantitative PCR analyses**

Total RNA was extracted using Trizol reagent (Invitrogen). RT-PCR was performed by using Q-PCR SYBR Green Real-time PCR Master Mix (Toyobo), High-Capacity cDNA Reverse Transcription Kits (Applied Biosystems, 4368814) and Real-time PCR equipment (Agilent Mx3005P) according to manufacturer's instructions. Electrophoresis was performed on a 2% agarose gel. All primers were listed in Table S3.

### **Statistical Analysis**

PiPSCs colony numbers and quantitative PCR results were analyzed by analysis of variance (ANOVA) with  $P < 0.05$  considered significant.

### **Reference**

- Aasen, T., Raya, A., Barrero, M.J., Garreta, E., Consiglio, A., Gonzalez, F., Vassena, R., Bilic, J., Pekarik, V., Tiscornia, G., *et al.* (2008). Efficient and rapid generation of induced pluripotent stem cells from human keratinocytes. *Nat Biotechnol* 26, 1276-1284.
- Gu, Q., Hao, J., Zhao, X.Y., Li, W., Liu, L., Wang, L., Liu, Z.H., and Zhou, Q. (2012). Rapid conversion of human ESCs into mouse ESC-like pluripotent state by optimizing culture conditions. *Protein Cell* 3, 71-79.
- Hao, J., Zhu, W., Sheng, C., Yu, Y., and Zhou, Q. (2009). Human parthenogenetic embryonic stem cells: one potential resource for cell therapy. *Sci China C Life Sci* 52, 599-602.
- Shen, Y., Matsuno, Y., Fouse, S.D., Rao, N., Root, S., Xu, R., Pellegrini, M., Riggs, A.D., and Fan, G. (2008). X-inactivation in female human embryonic stem cells is in a nonrandom pattern and prone to epigenetic alterations. *Proceedings of the National Academy of Sciences* 105, 4709-4714.
- Zhao, X.-y., Li, W., Lv, Z., Liu, L., Tong, M., Hai, T., Hao, J., Guo, C.-l., Ma, Q.-w., Wang, L., *et al.* (2009). iPS cells produce viable mice through tetraploid complementation. *Nature* 461, 86-U88.

Table S1 *In vitro* development of nuclear transfer embryos reconstructed from pig iPSCs

| pig lines | iPSCs cell | NO. of reconstructed embryos | No. of cleavage (%)           | No. of blastocyst (%)        |
|-----------|------------|------------------------------|-------------------------------|------------------------------|
| pips_h    | pips-4     | 130                          | 70 (53.28±4.19) <sup>a</sup>  | 8 (6.14±0.17) <sup>c</sup>   |
|           | pips-1     | 708                          | 155 (53.42±8.40) <sup>a</sup> | 19 (6.36±1.90) <sup>c</sup>  |
|           | pips-2     | 404                          | 92 (61.10±7.31) <sup>a</sup>  | 14 (9.30±4.33) <sup>c</sup>  |
| pips_m    | pips-n-3   | 435                          | 190 (80.2±5.37) <sup>b</sup>  | 26 (13.6±3.4) <sup>d</sup>   |
|           | pips-n-4   | 430                          | 256 (59.05±5.83) <sup>a</sup> | 64 (15.25±2.27) <sup>d</sup> |
|           | pips-n-6   | 280                          | 146 (52.00±3.03) <sup>a</sup> | 28 (9.92±2.01) <sup>d</sup>  |
| control   | PEF        | 262                          | 155 (84.2±5.03) <sup>b</sup>  | 38 (24.7±4.6) <sup>e</sup>   |

*Note:* Values with different superscripts indicate the numbers in the same column are significantly different and values with same superscripts indicate the numbers in the same column are not significantly different by one-way ANOVA ( $p < 0.05$ )

Table S2 *In vivo* development of nuclear transfer embryos reconstructed from pig iPSCs

| pig lines | iPSCs cell | NO. of transferred embryos | No. of recipients | No. of pregnancies | No. of cloned piglets |
|-----------|------------|----------------------------|-------------------|--------------------|-----------------------|
| pips_h    | pips-1     | 270                        | 2                 | 0                  | 0                     |
|           | pips-2     | 310                        | 2                 | 0                  | 0                     |
| pips_m    | pips-n-3   | 630                        | 4                 | 2                  | 0                     |
|           | pips-n-4   | 280                        | 1                 | 1                  | 0                     |
|           | pips-n-6   | 696                        | 4                 | 0                  | 0                     |
|           | pips-n-10  | 1074                       | 3                 | 2                  | 0                     |

Table S3 Primer sequence for RT-PCR and Q-PCR

| Gene name                       | Forward primers      | Reverse primers     |
|---------------------------------|----------------------|---------------------|
| <i>Oct4_3'UT</i>                | CAAACCTGAGGTGCCTGCCC | ATTGAACTTCACCTTCCCT |
| <i>R</i>                        | TTC                  | CCAACC              |
| <i>Sox2_3'UT</i>                | CATCAACGGTACACTGCCT  | ACTCTCCTCCCATTTCCT  |
| <i>R</i>                        | CTC                  | CTTT                |
| <i>Nanog_3'U</i>                | AATGATCGTCACATATCTTC | GTTCCATGGGCTCAGTGG  |
| <i>TR</i>                       | AGGCTGTA             | TCAAG               |
| <i>C-</i>                       | ATCCAAGACCACCACCACT  | GTTCACAGCAACATTCAG  |
| <i>myc_3'UTR</i>                | G                    | GTAGA               |
| <i>Oct4_v</i>                   | GAGGCCCTTGGAAGCTTAG  | CCCAGTGTGGTGGTACGG  |
|                                 | CC                   | GAAATC              |
| <i>Sox2_v</i>                   | TTGACGCGGTCCGGGCTGT  | CCCAGTGTGGTGGTACGG  |
|                                 | TCT                  | GAAATC              |
| <i>Klf4_v</i>                   | TAGTCGGGGCACCTGCTGG  | CCCAGTGTGGTGGTACGG  |
|                                 | ACGC                 | GAAATC              |
| <i>C-myc_v</i>                  | CGCTCTGCTGTTGCTGGTG  | CCCAGTGTGGTGGTACGG  |
|                                 | AT                   | GAAATC              |
| <i>Fgfr1</i>                    | ACTGCTGGAGTTAATACCA  | GCAGAGTGATGGGAGAGT  |
|                                 | CCG                  | CC                  |
| <i>Lif</i>                      | CACTGGAAACACGGGGCA   | AGGGCGGGAAGTTGGTCA  |
| <i>Bmp4</i>                     | CGTCATCCCAGATTACAT   | GAGTCGAAGCTCTGCGGA  |
|                                 |                      | T                   |
| <i>Smad4</i>                    | GGCTTCAGGTGGCTGGTCCG | ACCTGATGGAGCATTACT  |
|                                 | GA                   |                     |
| <i>Lifr</i>                     | CTCATCCCAGTGGCAGTG   | CCAGAACCTCAACATTAT  |
| <i>bfgf</i>                     | GCGACCCTCACATCAAACCT | CAGTGCCACATACCAACT  |
| <i>Ncstn</i>                    | CAGCAAAGAAGCTGGAGTTC | AGGAAAAGCTGGGGTCCT  |
|                                 | ATCACTCT             | CTTCAG              |
| <i>Osteonectin</i>              | TCGGCATCAAGGAGCAGG   | CAGGCAGAACGACAAACC  |
|                                 |                      | AT                  |
| <i>Neurod</i>                   | GACGAATGAAAGCCAACG   | CTCCGACAGAGCCCAGAT  |
| <i><math>\beta</math>-Actin</i> | AGATCGTGCGGGACATCAA  | GCGGCAGTGGCCATCTC   |
|                                 | G                    |                     |

## Supplementary Figure Legends

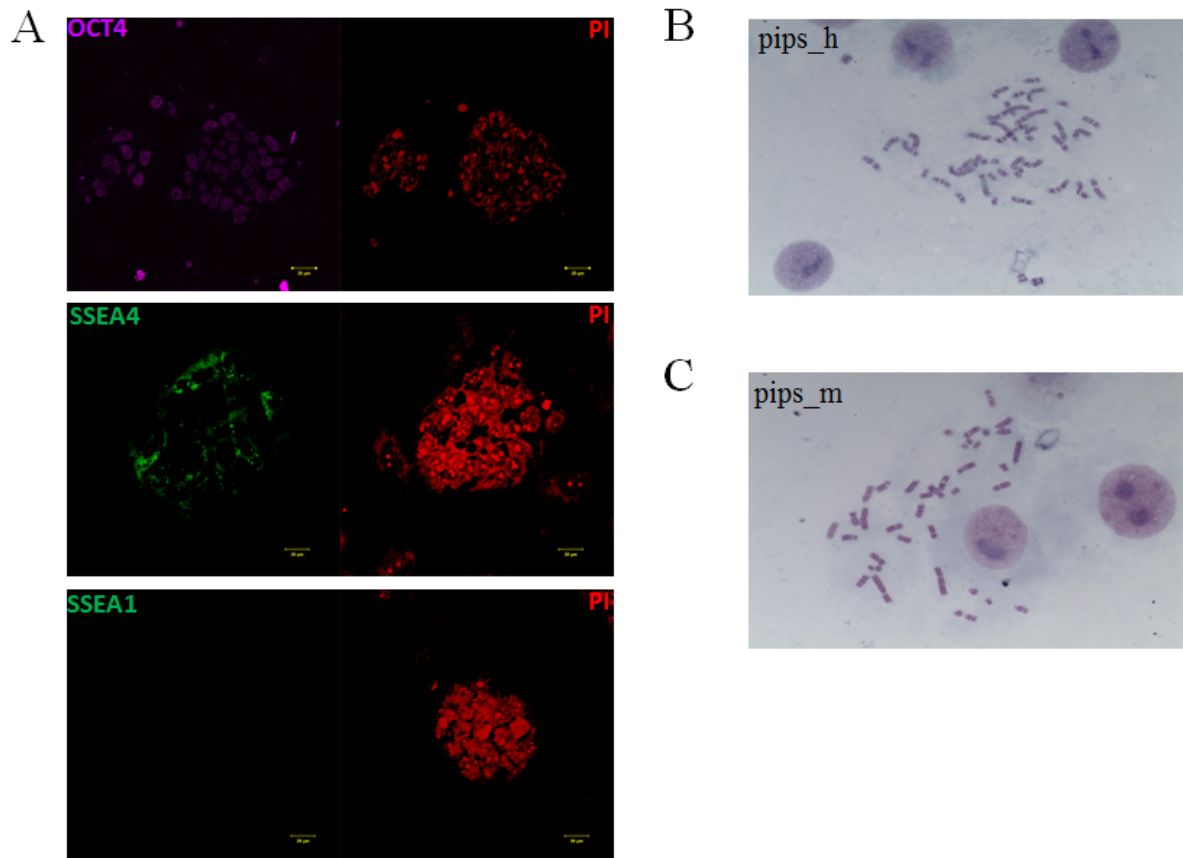

**Figure S1** | Immunostaining for pluripotency markers in pips\_h cells and karyotype analysis  
(A) Positive OCT4 (purple) and SSEA4 (green) were observed. SSEA1 was negative in pips\_h cells. The nucleus was stained with PI (red). Shown are examples from the pips-2 line. Scale bars are 20  $\mu$ m.  
(B) Karyotype analysis of pips-h cells. Shown here is a pips-1 spread. More than 75% of cells showed normal pig karyotype of 38 chromosomes.  
(C) Karyotype analysis of pips-m cells. Shown here is a pips-n-6 spread. More than 75% of cells showed normal pig karyotype of 38 chromosomes.

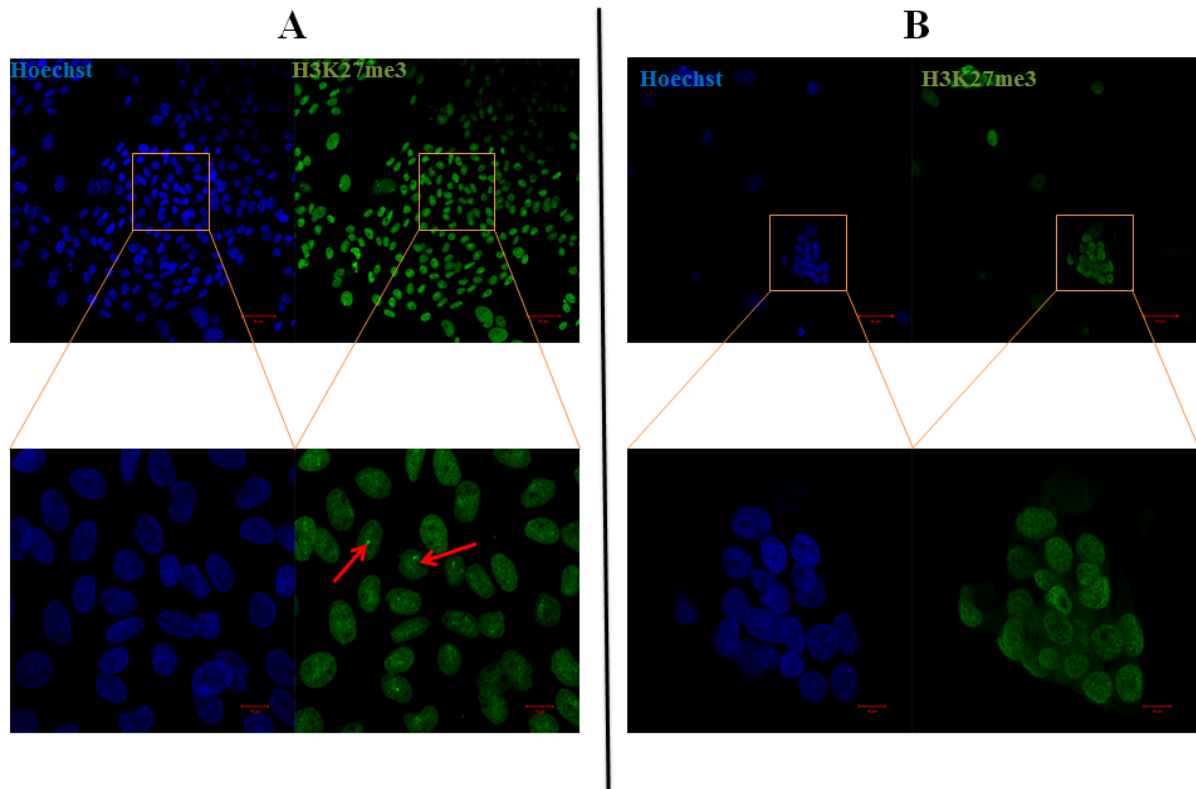

**Figure S2** | X chromosome status of pips\_h and pips\_m cells

- (A) Pips\_h cells clones were stained with H3K37 trimethyl (H3K27me3) antibodies. Red arrow pointed the H3K27me3 'spot'. Hoechst was used to stain the nucleus. Shown are examples from the pips-5 line. Top bars are 50 μm. Bottom bars are 10 μm.
- (B) Pips\_m cells clones were stained with H3K37 trimethyl (H3K27me3) antibodies. There were no H3K27me3 'spot'. Hoechst was used to stain the nucleus. Shown are examples from the pips-n-3 line. Top bars are 50 μm. Bottom bars are 10 μm.

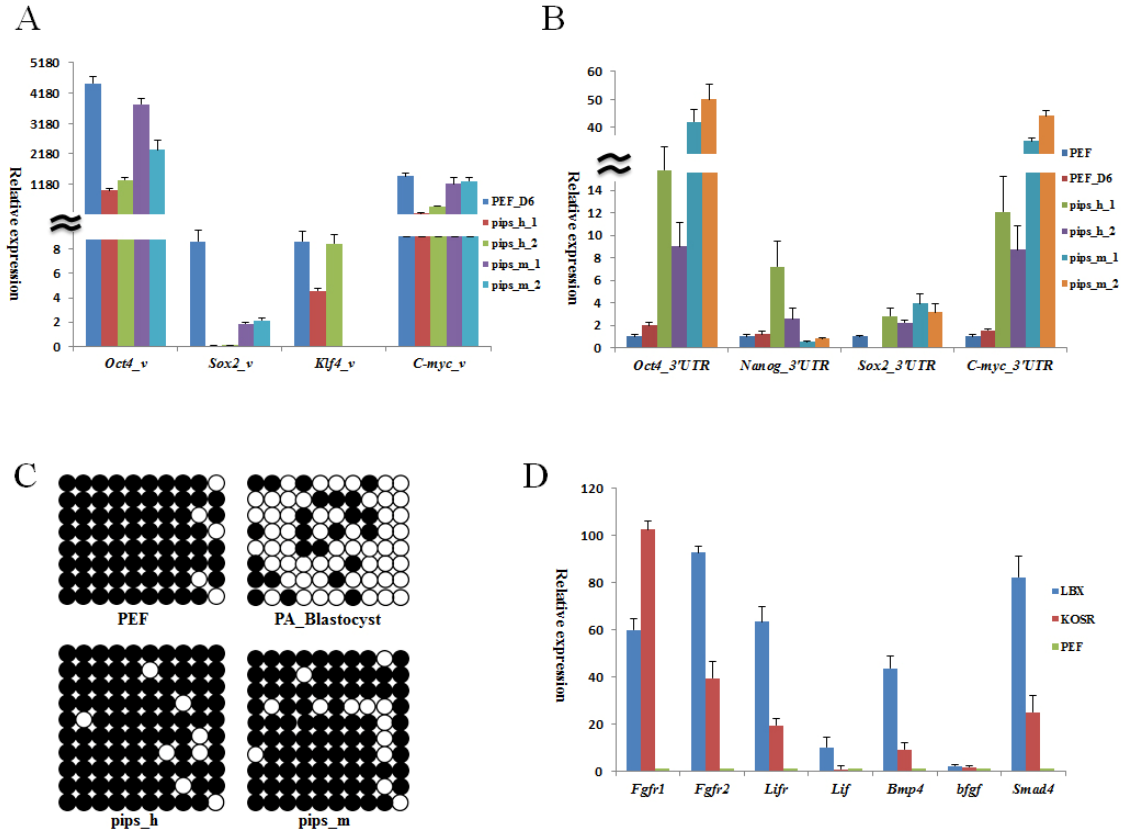

**Figure S3** |Pips\_m cells had different genes expression from pips\_h cells

- (A) Pips\_m and pips\_h cells had different transgene expression patterns. *Oct4\_v* and *c-Myc\_v* had not been silenced in pips\_h and pips\_m cells. In pips\_m cells, *Klf4\_v* had been silenced and *Sox2\_v* remained active but pips\_h cells had reverse patterns of *Klf4\_v* and *Sox2\_v* compared to pips\_m cells. Positive control was the PEFs infected after 6 days (PEF\_D6). Gene expression values were normalized with respect to  $\beta$ -actin.
- (B) Endogenous expression assays of pips\_m and pips\_h cells. There were specific primers to discriminate endogenous expression. *Oct4\_3'UTR* and *c-Myc\_3'UTR* expression was higher in pips\_m and pips\_h cells than that in PEF\_D6 and normal PEFs, but that was lower than the comprehensive transgenic expression. Pips\_m and pips\_h cells both had same level of *Sox2\_3'UTR* expression, which was higher than PEF\_D6 and normal PEFs. Pips\_h cells had higher endogenous *Nanog* expression than pips\_m cells. Gene expression values were normalized with respect to  $\beta$ -actin.
- (C) Bisulfite sequencing of *Oct4* promoter for pips\_m and pips\_h cells. Negative control was PEF and positive control was porcine parthenogenetic blastocyst embryos (PA\_Blastocyst).
- (D) Q-PCR analysis of some signaling gene expression in pips\_m and pips\_h cells. Gene expression values were normalized with respect to  $\beta$ -actin.



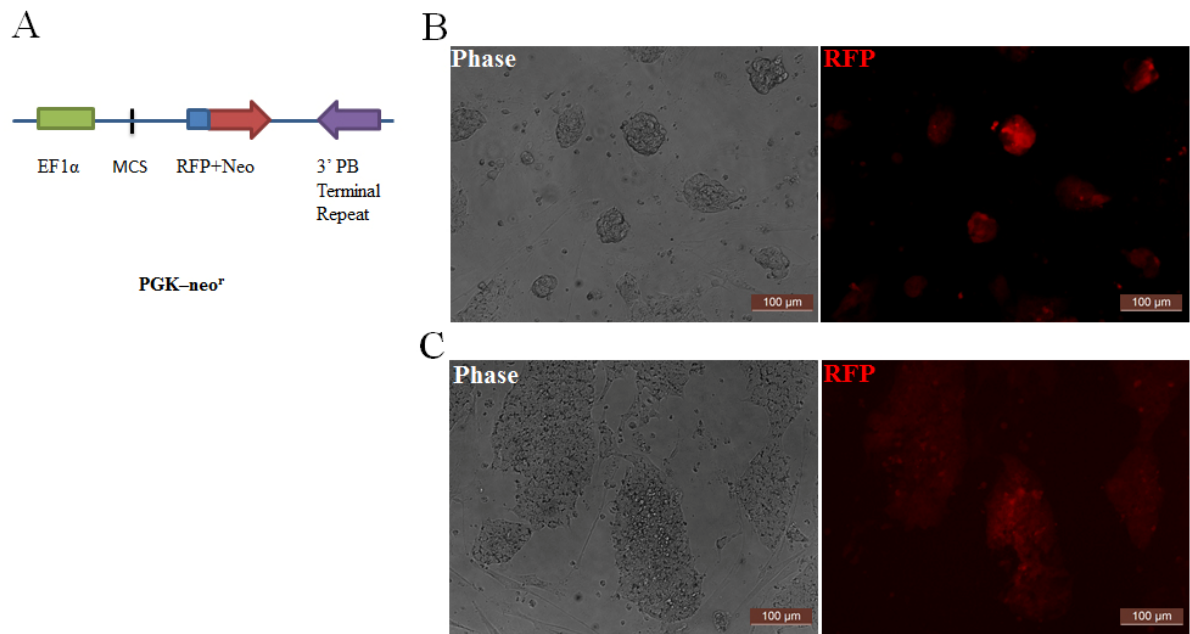

**Figure S4** | Transgenic application of pips\_m cells

- (A) A diagram of modified PiggyBac vector (PGK–neor). RFP and neor loci were shown.
- (B) The pips\_m sub-cell-line from picked RFP positive clones. Left, bright field image. Right, red fluorescence image. Scale bars are 100 μm.
- (C) The pips\_h sub-cell-line from picked RFP positive clones. Left, bright field image. Right, red fluorescence image. Scale bars are 100 μm.
